# Supplementary material for: A generic and effective strategy for highly effective “intrinsic” molecular luminescence in the condensed state
Source: Royal Society of Chemistry journal article supplement (doi:10.1039/c3tc30597j), 2013-01-01
Supplement: c3tc30597j.pdf [file c3tc30597j.pdf]

## Supporting Information for

### A generic and effective strategy for highly effective “intrinsic” molecular luminescence in condensed state

Yakun Zhu,<sup>a</sup> Shanyi Guang,<sup>b</sup> Hongyao Xu,<sup>\*a,c</sup> Xinyan Su,<sup>a,c</sup> Xiang Yang Liu<sup>d</sup>

State Key Laboratory for Modification of Chemical Fibers and Polymer Materials, College of  
Materials Science and Engineering, Donghua University, Shanghai  
201620, China

\* Electronic mail: [hongyaoxu@163.com](mailto:hongyaoxu@163.com) (Prof. Hongyao Xu)

#### Instrumentation

FTIR spectra were recorded as KBr disk on a Nicolet NEXUS 8700 FTIR spectrometer. <sup>1</sup>H NMR spectra were collected on a Bruker DMX-400 spectrometer using chlorform-*d* (CDCl<sub>3</sub>). Solid-state <sup>29</sup>Si NMR measurements were carried out at room temperature using a Bruker DMX-400 spectrometer at a resonance frequency of 79.49 MHz. Matrix Assisted Laser Desorption Ionization Time of Flight Mass Spectrometry (MALDI-TOF MS) was performed using a Voyager-DE RP in linear and reflectron modes. The matrix 2,5-dihydroxybenzoic acid (DHBA) was dissolved in THF (10mg/mL), and mixed with the sample solution (0.5~1 mg/mL in THF) in 1:1 v/v ratio. The samples were spotted onto the target and dried in air. The matrix 2,5-dihydroxybenzoic acid (DHBA) was dissolved in THF (10mg/mL), and mixed with the sample solution (0.5~1 mg/mL in THF) in 1:1 v/v ratio. The samples were spotted onto the target and dried in air. Elemental analyses were performed by CHNOS Elemental Analyzer, Vario El III. The optical property of the sample was measured by Shimadzu UV-265 spectrophotometer and

FP6600 Fluorescence spectrometer with a 1 cm quartz cell in tetrahydrofuran (THF,  $1 \times 10^{-5}$  M).

TGA was performed on a Perkin-Elmer TGA (thermogravimetric analysis) under an  $N_2$  atmosphere at a heating rate of  $10^\circ\text{C}/\text{min}$ . DSC was carried on a TA Instruments DSC 9000 equipped with a liquid nitrogen cooling accessory (LNCA) unit under a continuous nitrogen purge ( $50\text{ mL}/\text{min}$ ). The scan rate was  $10^\circ\text{C}/\text{min}$  within the temperature range  $30\text{--}300^\circ\text{C}$ . The atomic force microscope (AFM) images of films were taken in the tapping mode on Agilent 5500 AFM.

Quantum Efficiency: Photoluminescence excitation (PLE) in solution was determined by a modification of the relative method described by Demas and Crosby using 1,10-diphenylanthracene as references. The absorption at 297 nm was determined for each material at three different concentrations (maximum absorption of 20%). These samples were then diluted by equal amounts in order to avoid fluorimeter saturation and excimer formation, and the total area of the emission spectrum was calculated. For each solution, absorption and emission measurements were repeated a minimum of two times and averaged. The slope of a plot of emission versus absorption was determined for each material, and relative quantum efficiency was calculated according to the equation

$$\Phi_{\text{PL}(x)} = (A_s/A_x)(F_x/F_s)(n_x/n_s)^2 \Phi_{\text{PL}(s)} \quad (1)$$

where  $x$  is the sample to be measured,  $s$  the reference,  $A$  the absorption at the excitation wavelength,  $F$  the total integrated emission,  $n$  the refractive index of the solvent, and the quantum  $\Phi_{\text{PL}}$  yield.

PLQE ( $\Phi$ ) of materials in film was recorded by using 9,10-diphenylanthracene (dispersed in PMMA films with a concentration lower than  $1 \times 10^{-3}$  M and a PLQE of 83%) as a standard.

## Experimental section

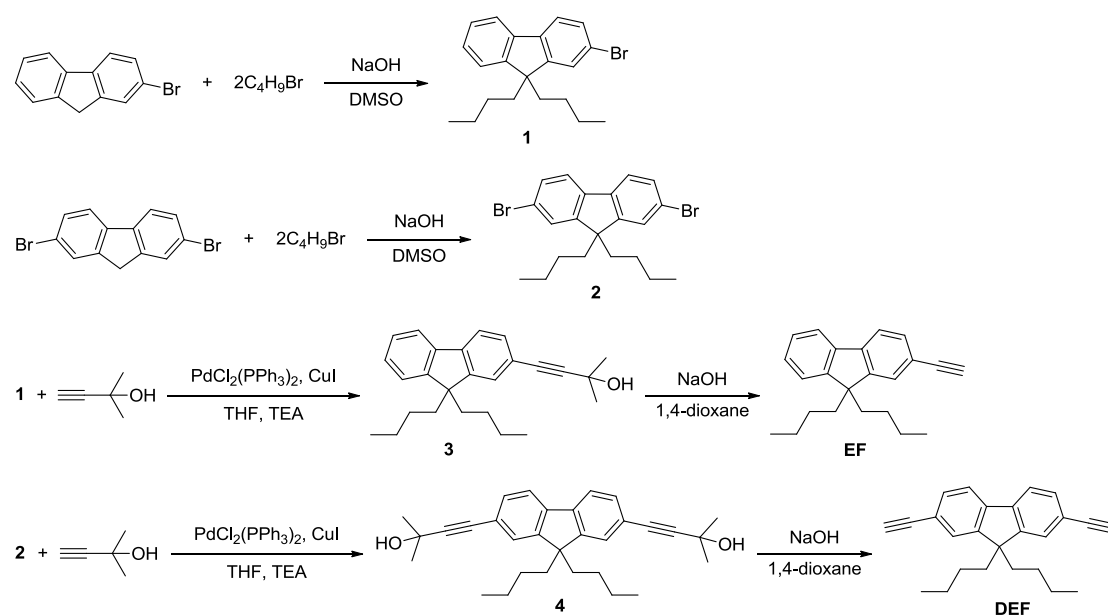

**Scheme S1.** The synthetic route of alkynyl monomers.

**2-bromo-9,9-dibutylfluorene (1):** 2-dibromofluorene (4.9g, 20mmol) and tetrabutyl ammonium bromide (38mg, 0.16mmol) were dissolved in 100ml DMSO. After the reaction mixture was stirring violently, 7ml of 0.5M aqueous NaOH solution and 1-bromobutane (4.8ml, 45mmol) were added drop wise to the mixture. The reaction mixture was stirred at room temperature for 3h. A precipitate was formed by adding 500ml water and filtered off. The solid was recrystallized from n-hexane to give white crystals (95%). mp 66 °C;  $^1\text{H}$  NMR (400 MHz,  $\text{CDCl}_3$ ,  $\delta$ ): 7.64-7.66 (m, 1H; Ar-H), 7.53-7.55 (d, 1H; Ar H), 7.42-7.45 (m, 2H; Ar H), 7.30-7.31 (m, 3H; Ar H), 1.90-1.95 (m, 4H;  $\text{CH}_2$ ), 1.04-1.26 (m, 4H;  $\text{CH}_2$ ), 0.82 (t,  $J=7.1$  Hz, 6H;  $\text{CH}_3$ ), 0.57-0.60 (m, 4H;  $\text{CH}_2$ ); FTIR ( $\text{cm}^{-1}$ , KBr): 2927, 2854 (s;  $\text{CH}_2$ ), 1462, 1112 (m; Ar). Elem. Anal. Calcd for  $\text{C}_{21}\text{H}_{25}\text{Br}$ : C, 70.59; H, 7.05. Found: C, 70.75; H, 6.94.

**2,7-Dibromo-9,9-dibutylfluorene (2):** 1-Bromobutane (3.97 g, 29.0 mmol) was added by using a syringe to a mixture of 2, 7-dibromofluorene (3.88g, 12.0mmol), tetrabutyl ammonium bromide (0.0225 g, 0.0975mmol) and 3.75 mL of 50% aqueous NaOH in DMSO (50.0 mL). The reaction

mixture was stirred at room temperature for 3h. The mixture was poured into H<sub>2</sub>O (500 mL), and then was extracted three times with dichloromethane. The combined organic layers were dried over anhydrous MgSO<sub>4</sub> and decolor by active carbon. The solvent was removed under reduced pressure. The crude product was purified by recrystallization by hexane as solvent to yield a colorless crystal (90%). mp 112 °C; <sup>1</sup>H NMR (400MHz, CDCl<sub>3</sub>, δ): 7.56 (d, 2H; Ar-H), 7.49 (m, 4H; Ar H), 1.96 (m, 4H; CH<sub>2</sub>), 1.14 (m, 4H; CH<sub>2</sub>), 0.74 (t, 6H; CH<sub>3</sub>), 0.62 (m, 4H; CH<sub>2</sub>); FTIR (cm<sup>-1</sup>, KBr): 2950, 2868 (s; CH), 1599, 1515, 858 (m; Ar). Elem. Anal. Calcd for C<sub>21</sub>H<sub>24</sub>Br<sub>2</sub>: C, 57.82; H, 5.55. Found: C, 57.52; H, 5.81.

**4-(9,9-dibutyl-9H-fluoren-2-yl)-2-methylbut-3-yn-2-ol (3):** Under nitrogen, a mixture of compound 2-bromo-9,9-dibutylfluorene (0.18g, 0.5mmol), 2-methylbut-3-yn-2-ol (0.4ml, 4mmol), PdCl<sub>2</sub>(PPh<sub>3</sub>)<sub>2</sub> (14mg, 0.02mmol) and CuI (2mg, 0.01mmol) was dissolved in 10 ml TEA and 10ml THF. The reaction mixture was refluxed at 70 °C for 10h. After cooling to room temperature, the insolubles were filtered off. After the removal of the solvent with a rotary evaporator, water and CH<sub>2</sub>Cl<sub>2</sub> were added to the mixture, and the organic phase was purified by column chromatography on silica gel with ethyl acetate/petroleum ether mixture (1:10 v/v) to give with yellow crystals (85%). mp 57 °C; <sup>1</sup>H NMR (400 MHz, CDCl<sub>3</sub>, δ): 7.61-7.68 (m, 2H; Ar H), 7.39-7.41 (m, 2H; Ar H), 7.31-7.33 (m, 3H; Ar H), 2.08 (s, 1H; OH), 1.94 (t, *J*=7.7 Hz, 4H; CH), 1.66 (s, 6H; CH<sub>3</sub>), 1.02-1.25 (m, 4H; CH<sub>2</sub>), 0.82 (t, *J*=7.1 Hz, 6H; CH<sub>3</sub>), 0.55-0.58 (m, 4H; CH<sub>2</sub>); FTIR (cm<sup>-1</sup>, KBr): 3378 (m; -OH), 2927, 2852 (s; -CH<sub>2</sub>), 2228 (w; C≡C), 1458, 1166 (m; Ar-H). Elem. Anal. Calcd for C<sub>26</sub>H<sub>32</sub>O: C, 86.62; H, 8.95. Found: C, 86.81; H, 8.73.

**2-ethynyl-9,9-dibutylfluorene (EF):** Under nitrogen, a mixture of compound 2-(2-methyl-3-butyne-2-ol)-9,9-dibutylfluorene (0.1g, 0.25mmol), NaOH (4.8g, 1.2mmol) was

added into 20ml 1,4-dioxane. The reaction mixture was refluxed at 80 °C for 4h. After cooling to room temperature, water and CH<sub>2</sub>Cl<sub>2</sub> were added to the mixture, and the organic phase purified by column chromatography on silica gel with ethyl acetate/petroleum ether mixture (1:6 v/v) to give with yellow crystals (95%). mp 70 °C; <sup>1</sup>H NMR (400 MHz, CDCl<sub>3</sub>, δ): 7.66-7.74 (m, 2H; Ar H), 7.51-7.53 (m, 2H; Ar H), 7.32-7.39 (m, 3H; Ar H), 3.16 (s, 1H; C≡CH), 1.97-2.02 (m, 4H; CH<sub>2</sub>), 1.08-1.32 (m, 4H; CH<sub>2</sub>), 0.86 (t, *J*=7.1 Hz, 6H; CH<sub>3</sub>), 0.59-0.69 (m, 4H; CH<sub>2</sub>); FTIR (cm<sup>-1</sup>, KBr): 3275 (s; C≡C-H), 2954, 2924, 2854 (s; -CH<sub>2</sub>), 2099 (w; C≡C), 1451, 1126 (m; Ar-H). Elem. Anal. Calcd for C<sub>23</sub>H<sub>26</sub>: C, 91.34; H, 8.66. Found: C, 91.11; H, 8.89.

**4,4'-(9,9-dibutyl-9H-fluorene-2,7-diyl)bis(2-methylbut-3-yn-2-ol) (4):** This was prepared as above **3**. Yield: 70%. mp 103 °C; <sup>1</sup>H NMR (400 MHz, CDCl<sub>3</sub>, δ): 7.60(d, *J* = 7.7 Hz, 2H; Ar H), 7.38(m, 4H, Ar H), 2.03(s, 2H, OH), 1.92(m, *J* = 4.2 Hz, 4H; CH<sub>2</sub>), 1.27-1.02(m, 4H; CH<sub>2</sub>), 0.87(t, *J* = 7.2 Hz, 6H; CH<sub>3</sub>), 1.65(s, 12H; CH<sub>3</sub>), 0.54(m, *J* = 4.0 Hz, 4H; CH<sub>2</sub>). FTIR (cm<sup>-1</sup>, KBr): 3350(OH), 2926(CH<sub>3</sub>), 2853(CH<sub>2</sub>), 2222(C≡C), 1639, 887(Ar). Elem. Anal. Calcd for C<sub>31</sub>H<sub>38</sub>O<sub>2</sub>: C, 84.12; H, 8.65. Found: C, 84.01; H, 8.72.

**2,7-diethynyl-9,9-dibutylfluorene (DEF):** This was prepared as above **4**. Yield: 80%. mp 114 °C; <sup>1</sup>H NMR (400 MHz, CDCl<sub>3</sub>, δ): 7.62(d, *J* = 7.6 Hz, 2H; Ar H), 7.46(t, *J* = 5.6 Hz, 4H; Ar H), 3.13(2H, s, C≡C-H), 1.93(4H, m, CH<sub>2</sub>), 1.27-1.02(4H, m, CH<sub>2</sub>), 0.86(6H, t, *J* = 6.9 Hz, CH<sub>3</sub>), 0.57(d, *J* = 7.2 Hz, 4H; CH<sub>2</sub>). FTIR (cm<sup>-1</sup>, KBr): 3309(C≡C-H), 2920(CH<sub>3</sub>), 2853(CH<sub>2</sub>), 2106(C≡CH), 1639, 887(Ar). Elem. Anal. Calcd for C<sub>25</sub>H<sub>26</sub>: C, 91.97; H, 8.03. Found: C, 91.91; H, 8.09.

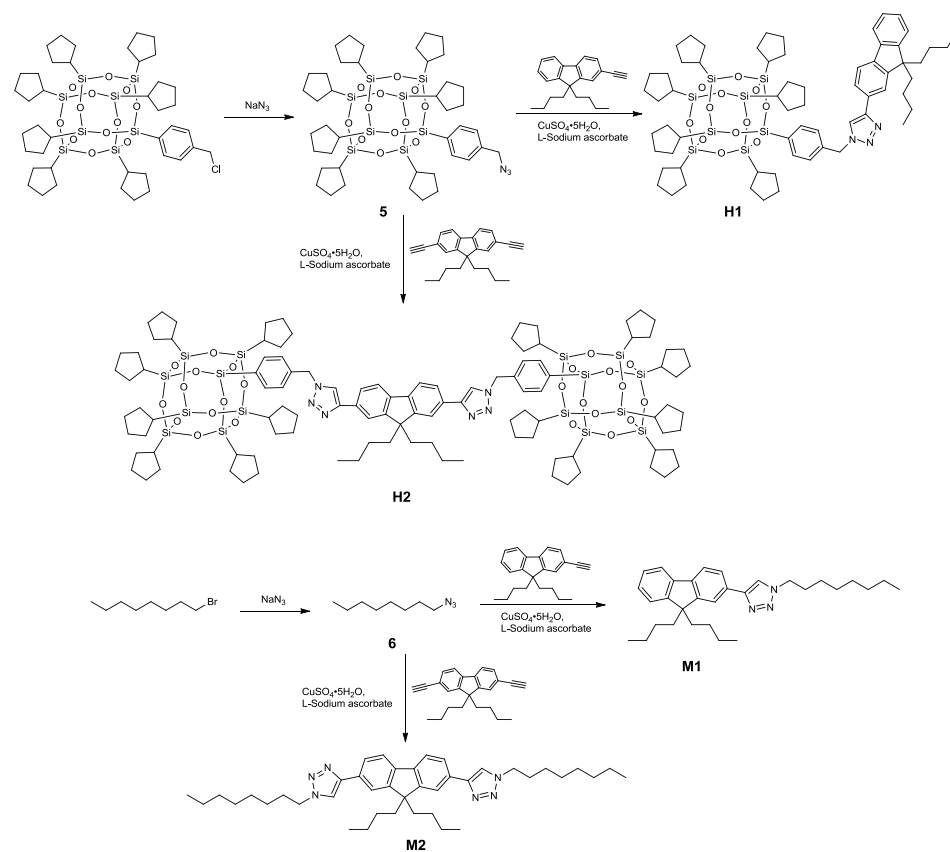

**Scheme S2.** The synthetic route of H1, H2, M1 and M2.

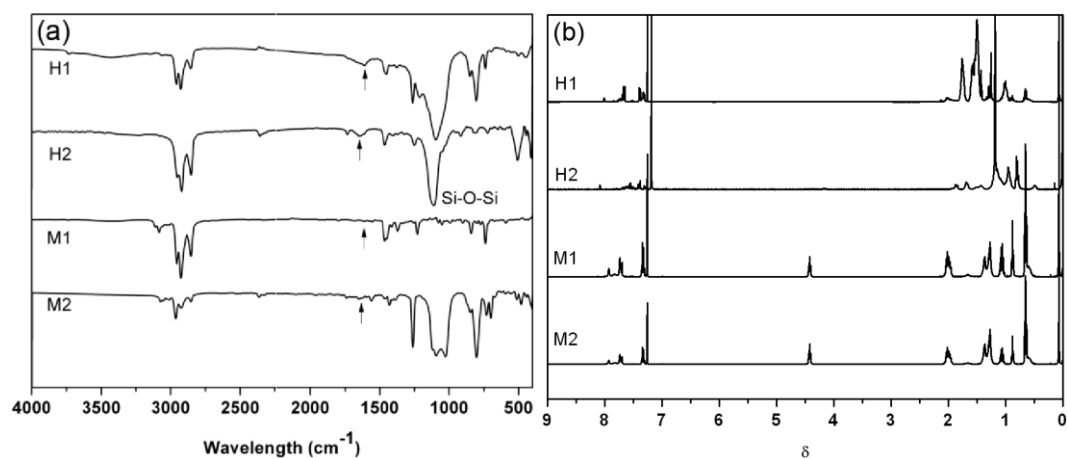

**Fig. S1** The FTIR (a) and  $^1\text{H}$  NMR (b) spectra of M1, M2, H1 and H2

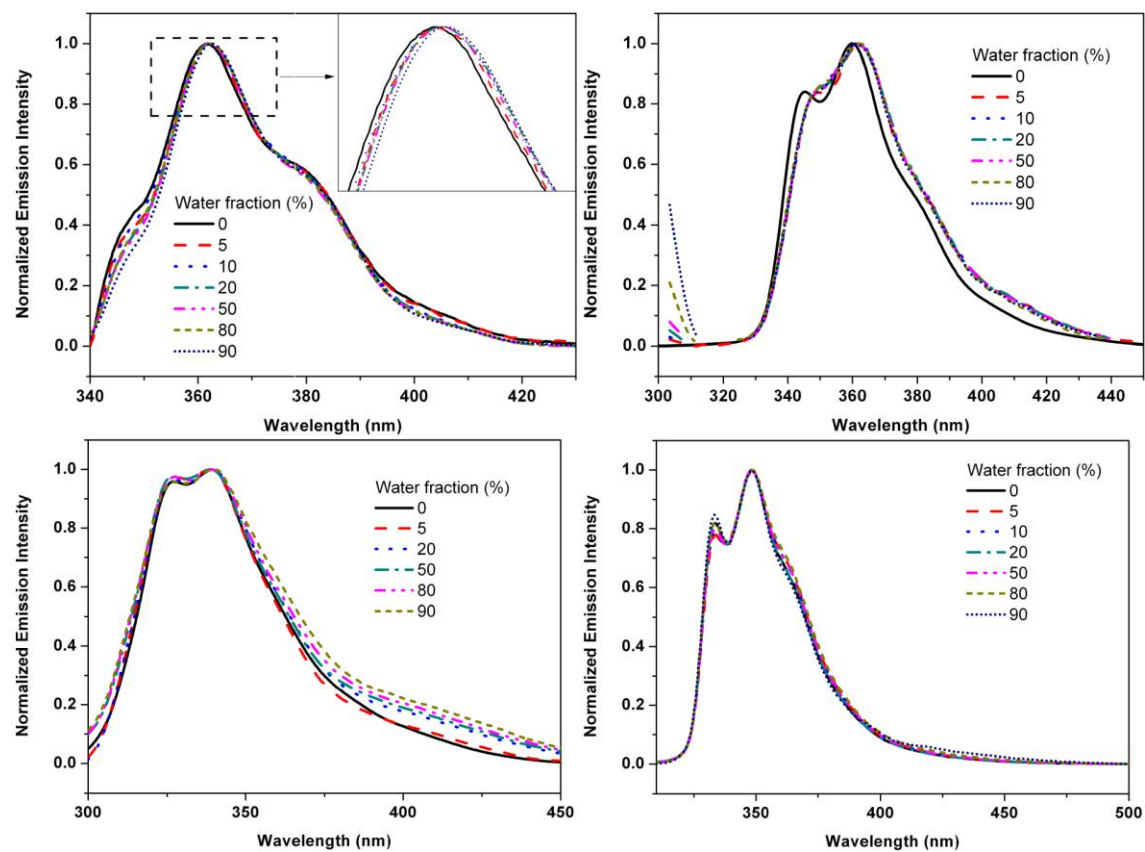

**Fig. S2** Normalized PL spectra of the dilute solutions of M1(a), M2(b), H1(c), and H2(d) ( $10^{-6}$  mol/L) in THF/Water mixtures with different water contents.

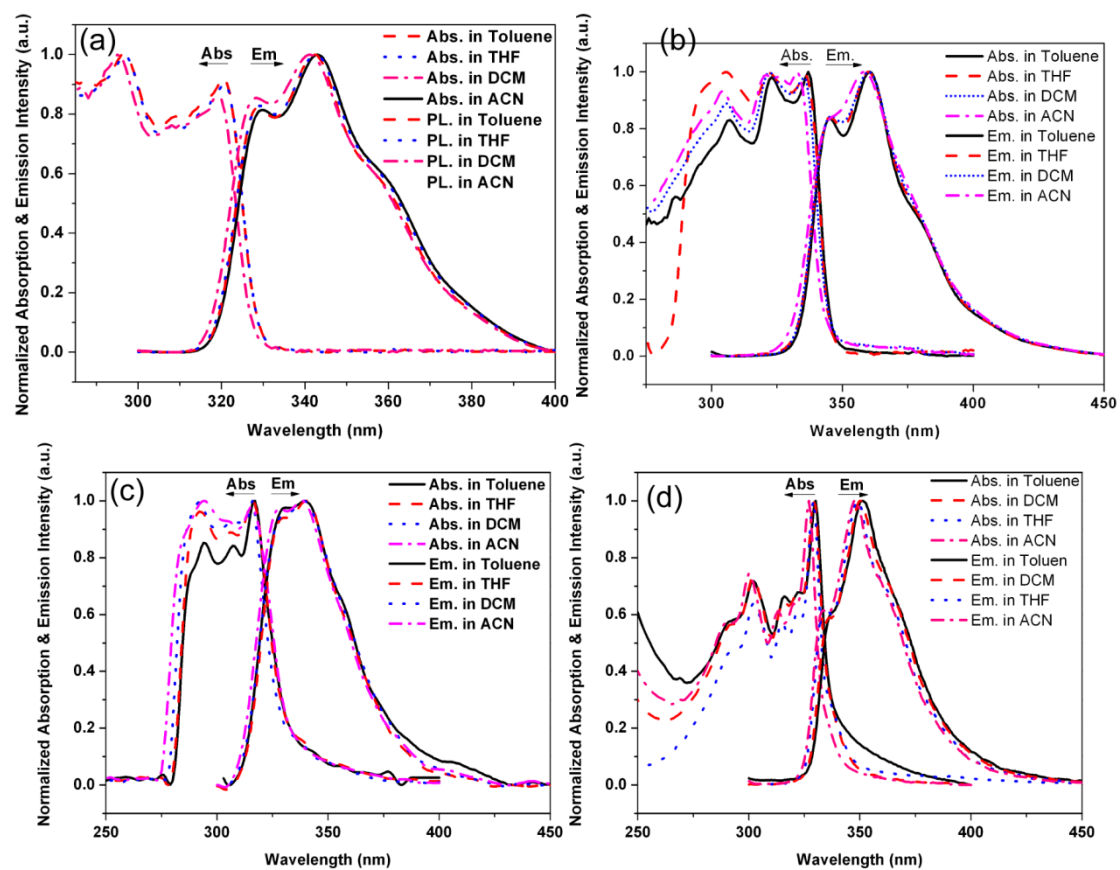

**Fig. S3** Solvatochromism of **M1**(a), **M2**(b), **H1**(c) and **H2**(d) in Toluene, THF, DCM and ACN.



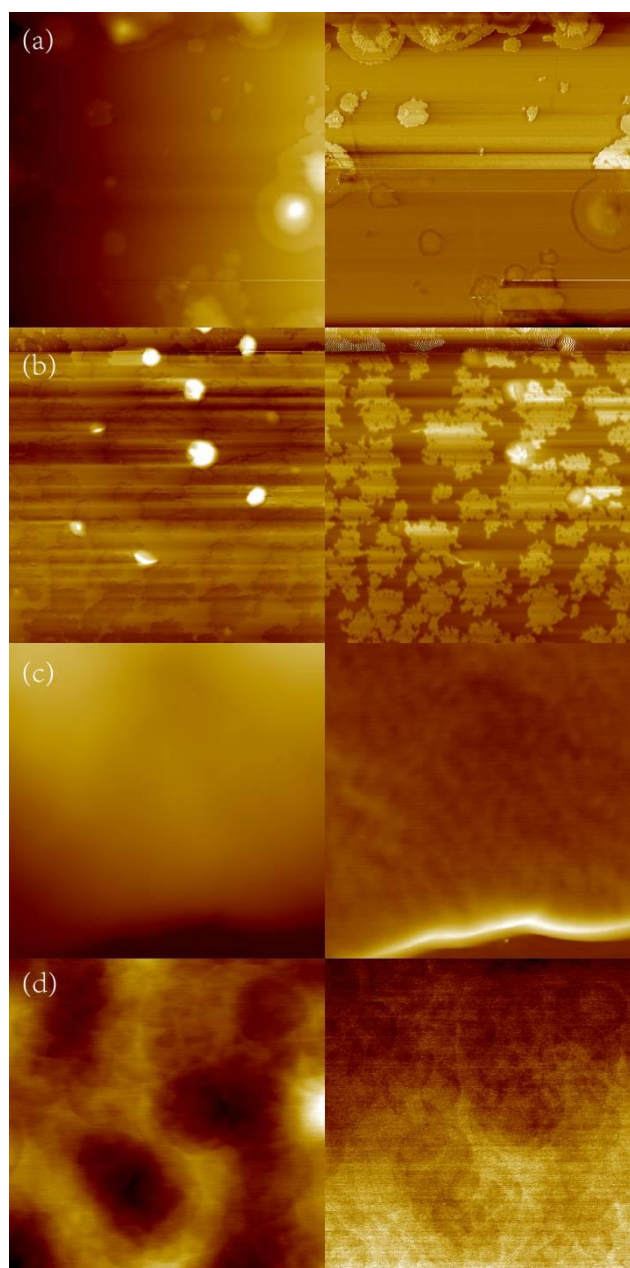

**Fig. S4** Atomic force microscope images of  $9 \times 9 \mu\text{m}^2$  tapping mode for M1 (a), M2 (b), H1 (c) and H2 (d) films: (left) height and (right) phase images (Z ranges for the height and phase images are 33, 28, 8, 6 nm, respectively)

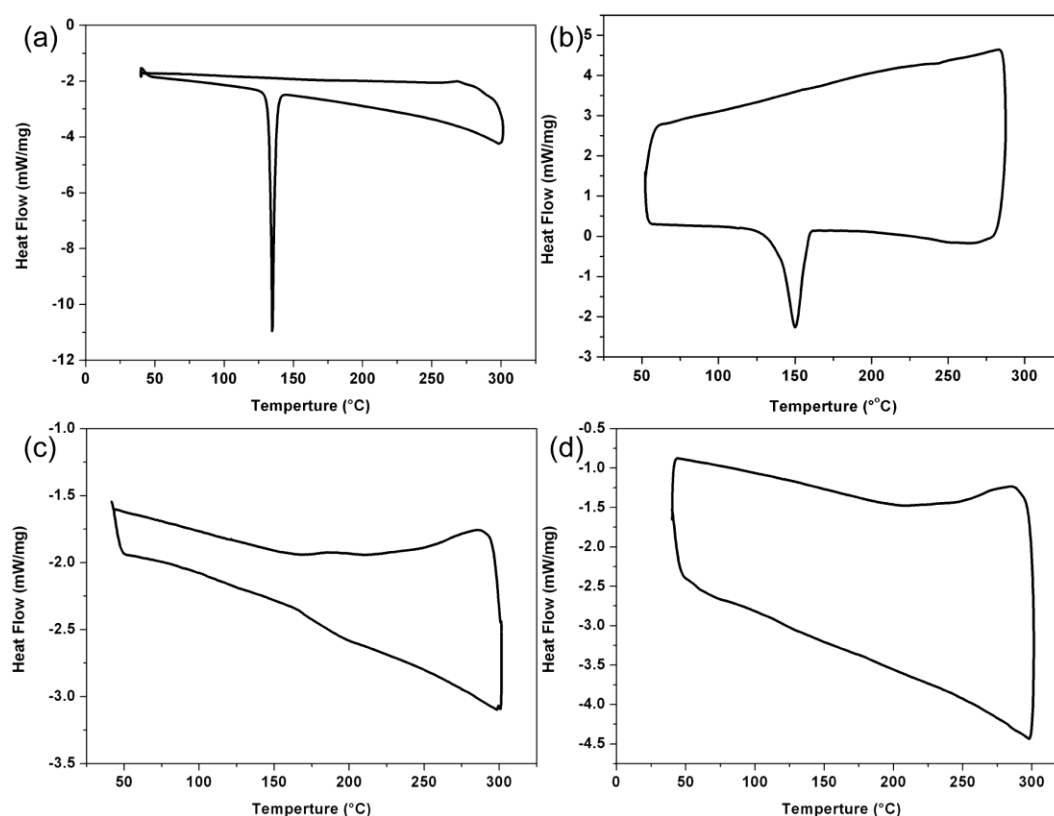

**Fig. S5** DSC curve of **M1**(a), **M2**(b), **H1**(c) and **H2**(d)

**Table S1** Absorption and emission maxima (nm)<sup>a</sup> of **M1**, **M2**, **H1** and **H2** in a series of solvents.

| Solvent         | <b>M1</b>              |                       | <b>M2</b>              |                       | <b>H1</b>              |                       | <b>H2</b>              |                       |
|-----------------|------------------------|-----------------------|------------------------|-----------------------|------------------------|-----------------------|------------------------|-----------------------|
|                 | $\lambda_{\text{abs}}$ | $\lambda_{\text{em}}$ | $\lambda_{\text{abs}}$ | $\lambda_{\text{em}}$ | $\lambda_{\text{abs}}$ | $\lambda_{\text{em}}$ | $\lambda_{\text{abs}}$ | $\lambda_{\text{em}}$ |
| Toluene         | 298,321                | 343                   | 330                    | 351                   | 294,317                | 337                   | 330                    | 350                   |
| Tetrahydrofuran | 297,320                | 342                   | 329                    | 350                   | 293,316                | 339                   | 329                    | 350                   |
| Dichloromethane | 297,321                | 343                   | 329                    | 349                   | 292,316                | 338                   | 329                    | 349                   |
| Acetonitrile    | 295,319                | 341                   | 327                    | 348                   | 294,316                | 337                   | 330                    | 350                   |

<sup>a</sup> In THF ( $10^{-5}$  mol/L). Excitation wavelength was 297 nm.

**Table S2** Thermal characterization of compounds.

| compound | T <sub>g</sub><br>(°C) | T <sub>m</sub><br>(°C) | T <sub>d5%</sub><br>(°C) | ceramic<br>yield,<br>% | theor<br>yield,<br>% |
|----------|------------------------|------------------------|--------------------------|------------------------|----------------------|
| AF       | -                      | -                      | 156.8                    | 8.1                    | -                    |
| POSSCl   | -                      | -                      | 349.3                    | 39.7                   | 40.6                 |
| M1       | -                      | 134.5                  | 335.9                    | 3.61                   | -                    |
| M2       | 115.5                  | 167.6                  | 260.5                    | 2.82                   | -                    |
| H1       | -                      | -                      | 380.2                    | 45.0                   | 45.9                 |
| H2       | -                      | 149.2                  | 394.6                    | 26.5                   | 52.8                 |
